# Supplementary material for: Caterpillar Responses to Gustatory Stimuli in Potato Tuber Moths: Electrophysiological and Behavioral Insights
Source: MDPI journal article supplement (doi:10.3390/life13112174), 2023-11-07
Supplement: s1 [file s1]

Supplementary Materials for

## Caterpillar Responses to Gustatory Stimuli in Potato Tuber Moths: Electrophysiological and Behavioral Insights

**This document contains:**

**Figure S1.** Gustatory SSR test of mouthparts and maxillary palp sensillum styloconicum of the 4th instar larvae *P. operculella*

**Figure S2.** Schematic diagram of feeding selection behavior of the 4th instar larvae *P. operculella*

**Table S1.** Lethal effects of the nicotine against the larvae of 4th instar larvae *P. operculella*

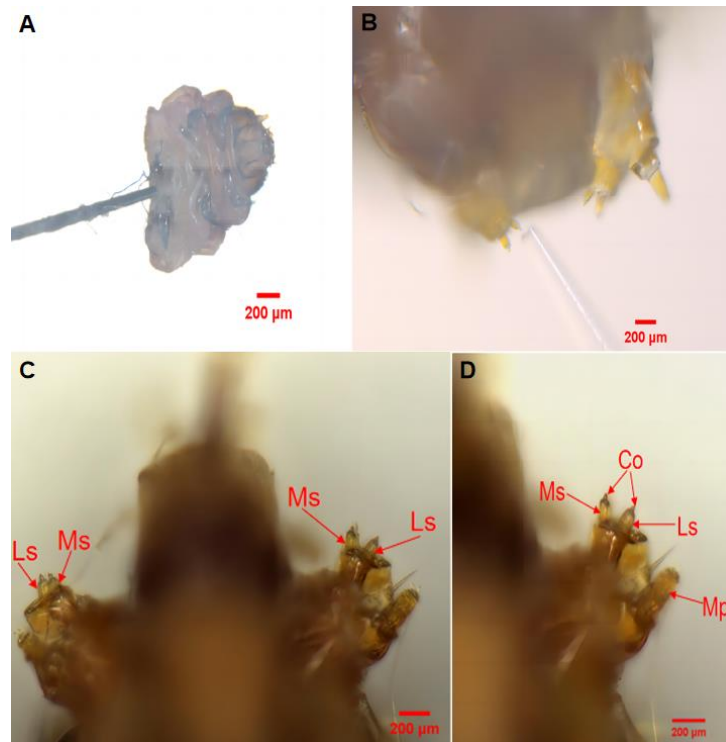

**Figure S1.** Gustatory SSR test of mouthparts and maxillary palp sensillum styloconicum of the 4th instar larvae *P. operculella*. A: Tungsten wire securing the 4th instar larva of the potato tuberworm. B: Glass capillary inserted into the larva's mouthparts at the styloconic sensillum end. Imaging was conducted using a stereomicroscope (DMC4500, Leica) and images were captured using LAS V4.9 software. C, D: Schematic representation of the styloconic sensilla on the labrum of the 4th instar larva of the potato tuberworm. Images of the larval mouthparts were obtained using a super depth-of-field 3D microscope (Smartzoom 5, Zeiss). MP: Maxillary palpus; Ls: Lateral sensillum styloconicum; Ms: Medial sensillum styloconicum; Co: Conic tip of the sensillum.

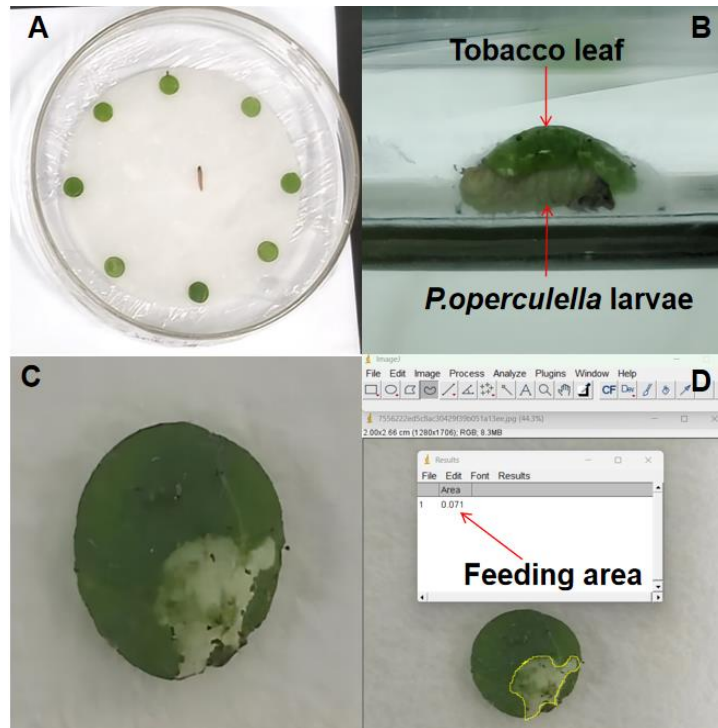

**Figure S2.** Schematic diagram of feeding selection behavior of the 4th instar larvae *P. operculella*. A: Dual-choice leaf disk assay. B: A larva was feeding on tobacco leaf disks by leaf diving. C: A tobacco leaf disk after feeding. D: Measuring the area of tobacco leaf disks taken using image J software.

**Table S1.** Lethal effects of the nicotine against the larvae of 4th instar larvae *P. operculella*.

| Nicotine Concentration<br>(mmol/L) | Total Population<br>(head) | Number of Dead<br>(head) | Death Rate<br>(%) |
|------------------------------------|----------------------------|--------------------------|-------------------|
| 10                                 | 35                         | 2                        | 5.71%             |
| 30                                 | 35                         | 5                        | 14.29%            |
| 50                                 | 35                         | 7                        | 20.00%            |
